# Supplementary material for: Interface mediated semiconducting to metallic like transition in ultrathin Bi2Se3 films on (100) SrTiO3 grown by molecular beam epitaxy
Source: Royal Society of Chemistry journal article supplement (doi:10.1039/c5ra17949a), 2015-01-01
Supplement: c5ra17949a1.pdf [file c5ra17949a1.pdf]

## 1. Supplementary information

### Interface mediated semiconducting to metallic like transition in ultrathin $\text{Bi}_2\text{Se}_3$ films on (100) $\text{SrTiO}_3$ grown by molecular beam epitaxy

Anil K. Debnath<sup>1\*</sup>, R. Prasad<sup>1</sup>, Ajay Singh<sup>1\*</sup>, Soumen Samanta<sup>1</sup>, Ashwini Kumar<sup>1</sup>, Anil Bohra<sup>1</sup>, Debarati Bhattacharya<sup>2</sup>, Saibal Basu<sup>2</sup>, Niraj Joshi<sup>3</sup>, Dinesh K. Aswal<sup>1</sup>, S. K. Gupta<sup>1</sup>

<sup>1</sup>Technical Physics Division, Bhabha Atomic Research Center, Mumbai-400 085, India

<sup>2</sup>Solid State Physics Division, Bhabha Atomic Research Center, Mumbai-400 085, India

<sup>3</sup>Sahyadri College of Engineering and Management, Mangalore-575007, Karnataka, India

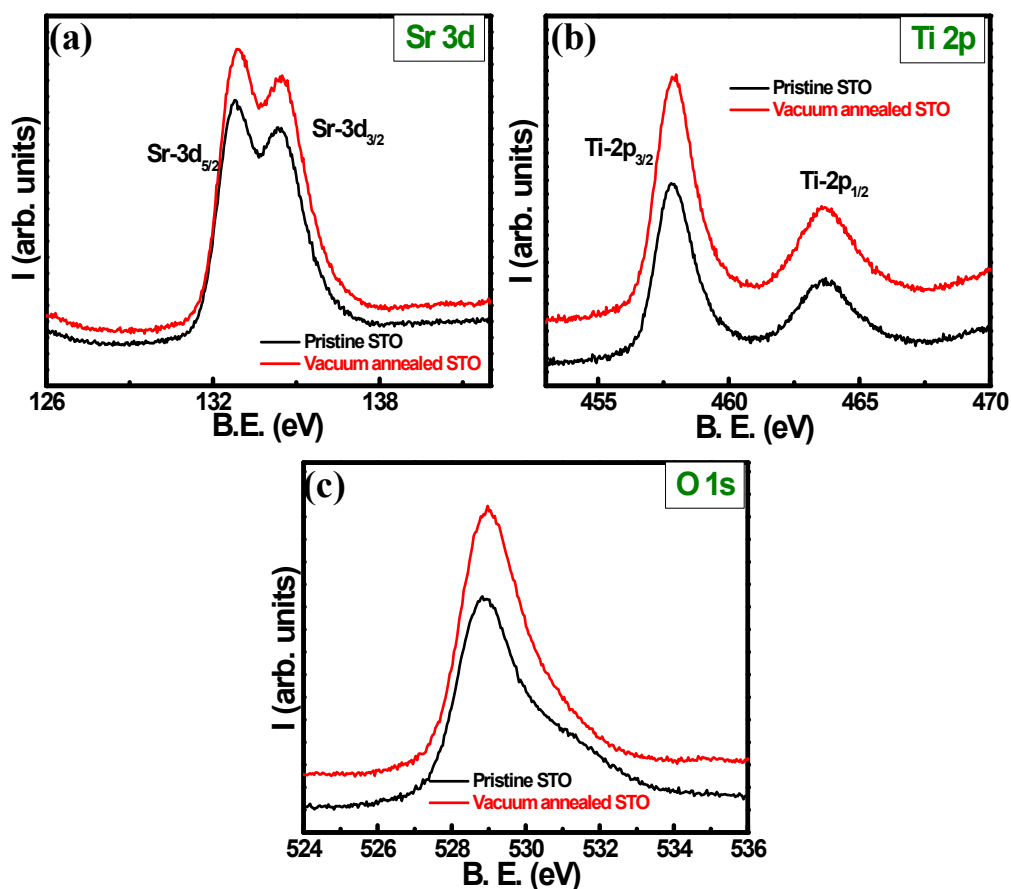

**Figure S1:** XPS spectra for pristine and vacuum annealed  $\text{SrTiO}_3$  single crystal substrate.

High resolution XPS spectra of (a) Sr 3d (b)Ti 2p and (c)O 1s.
